# Supplementary material
Source: PubMed Central journal article supplement (PMC6053269)
Supplement: NIHMS980640-supplement-Supplemental_Information.pdf [file NIHMS980640-supplement-Supplemental_Information.pdf]

## Structural Neuroimaging of Anorexia Nervosa: Future Directions in the Quest for Mechanisms Underlying Dynamic Alterations

### *Supplemental Information*

#### Supplemental References

##### Structural MRI studies counted in Figure 2

Doraiswamy P, Ranga Rama Krishnan K, Figiel GS, Husain MM, Boyko OB, Kenneth Rockwell WJ, Ellinwood Jr. EH (1990): A brain magnetic resonance imaging study of pituitary gland morphology in anorexia nervosa and bulimia. *Biol Psychiatry*. 28: 110–116.

Kornreich L, Shapira A, Horev G, Danziger Y, Tyano S, Mimouni M (1991): CT and MR evaluation of the brain in patients with anorexia nervosa. *Am J Neuroradiol*. 12: 1213–1216.

Husain MM, Black KJ, Murali Doraiswamy P, Shah SA, Kenneth Rockwell WJ, Ellinwood Jr. EH, Ranga Rama Krishnan K (1992): Subcortical brain anatomy in anorexia and bulimia. *Biol Psychiatry*. 31: 735–738.

Golden NH, Ashtari M, Kohn MR, Patel M, Jacobson MS, Fletcher A, Shenker IR (1996): Reversibility of cerebral ventricular enlargement in anorexia nervosa, demonstrated by quantitative magnetic resonance imaging. *J Pediatr*. 128: 296–301.

Katzman DK, Lambe EK, Mikulis DJ, Ridgley JN, Goldbloom DS, Zipursky RB (1996): Cerebral gray matter and white matter volume deficits in adolescent girls with anorexia nervosa. *J Pediatr*. 129: 794–803.

Kingston K, Szmukler G, Andrewes D, Tress B, Desmond P (1996): Neuropsychological and structural brain changes in anorexia nervosa before and after refeeding. *Psychol Med*. 26: 15–28.

Swayze VW, Andersen A, Arndt S, Rajarethinam R, Fleming F, Sato Y, Andreasen NC (1996): Reversibility of brain tissue loss in anorexia nervosa assessed with a computerized Talairach 3-D proportional grid. *Psychol Med*. 26: 381–390.

Katzman DK, Zipursky RB, Lambe EK, Mikulis DJ (1997): A Longitudinal Magnetic Resonance Imaging Study of Brain Changes in Adolescents With Anorexia Nervosa. *Arch Pediatr Adolesc Med*. 151: 793–797.

Kohn MR, Ashtari M, Golden NH, Schebendach J, Patel M, Jacobson MS, Shenker IR (1997): Structural Brain Changes and Malnutrition in Anorexia Nervosa. *Ann N Y Acad Sci*. 817: 398–399.

Lambe EK, Katzman DK, Mikulis DJ, Kennedy SH, Zipursky RB (1997): Cerebral Gray Matter Volume Deficits After Weight Recovery From Anorexia Nervosa. *Arch Gen Psychiatry*. 54: 537–542.

Sieg KG, Hidler MS, Graham MA, Steele RL, Kugler LR (1997): Hyperintense subcortical brain alterations in anorexia nervosa. *Int J Eat Disord.* 21: 391–394.

Neumärker KJ, Bzufka WM, Dudeck U, Hein J, Neumärker U (2000): Are there specific disabilities of number processing in adolescent patients with anorexia nervosa? Evidence from clinical and neuropsychological data when compared to morphometric measures from magnetic resonance imaging. *Eur Child Adolesc Psychiatry.* 9: S111–S121.

Drevelengas A, Chourmouzi D, Pitsavas G, Charitandi A, Boulogianni G (2001): Reversible brain atrophy and subcortical high signal on MRI in a patient with anorexia nervosa. *Neuroradiology.* 43: 838–840.

Giordano GD, Renzetti P, Parodi RC, Foppiani L, Zandrino F, Giordano G, Sardanelli F (2001): Volume measurement with magnetic resonance imaging of hippocampus-amygdala formation in patients with anorexia nervosa. *J Endocrinol Invest.* 24: 510–514.

Trummer M, Eustacchio S, Unger F, Tillich M, Flaschka G (2002): Right hemispheric frontal lesions as a cause for anorexia nervosa report of three cases. *Acta Neurochir (Wien).* 144: 797–801.

Swayze VW, Andersen AE, Andreasen NC, Arndt S, Sato Y, Ziebell S (2003): Brain tissue volume segmentation in patients with anorexia nervosa before and after weight normalization. *Int J Eat Disord.* 33: 33–44.

Connan F, Murphy F, Connor SE, Rich P, Murphy T, Bara-Carill N, *et al.* (2006): Hippocampal volume and cognitive function in anorexia nervosa. *Psychiatry Res Neuroimaging.* 146: 117–125.

Wagner A, Greer P, Bailer UF, Frank GK, Henry SE, Putnam K, *et al.* (2006): Normal brain tissue volumes after long-term recovery in anorexia and bulimia nervosa. *Biol Psychiatry.* 59: 291–293.

Mühlau M, Gaser C, Ilg R, Conrad B, Leibl C, Cebulla MH, *et al.* (2007): Gray Matter Decrease of the Anterior Cingulate Cortex in Anorexia Nervosa. *Am J Psychiatry.* 164: 1850–1857.

Chui HT, Christensen BK, Zipursky RB, Richards BA, Hanratty MK, Kabani NJ, *et al.* (2008): Cognitive function and brain structure in females with a history of adolescent-onset anorexia nervosa. *Pediatrics.* 122: e426-37.

McCormick LM, Keel PK, Brumm MC, Bowers W, Swayze V, Andersen A, Andreasen N (2008): Implications of starvation-induced change in right dorsal anterior cingulate volume in anorexia nervosa. *Int J Eat Disord.* 41: 602–610

Nogal P, Pniewska-Siark B, Lewinski A (2008): Relation of trophic changes in the central nervous system, measured by the width of cordical sulci, to the clinical course of anorexia nervosa (II). *Neuro Endocrinol Lett.* 29: 879–883.

Castro-Fornieles J, Bargalló N, Lázaro L, Andrés S, Falcon C, Plana MT, Junqué C (2009): A cross-sectional and follow-up voxel-based morphometric MRI study in adolescent anorexia nervosa. *J Psychiatr Res.* 43: 331–340.

Boghi A, Sterpone S, Sales S, D'Agata F, Bradac GB, Zullo G, Munno D (2011): In vivo evidence of global and focal brain alterations in anorexia nervosa. *Psychiatry Res.* 192: 154–159.

Joos A, Klöppel S, Hartmann A, Glauche V, Tüscher O, Perlov E, *et al.* (2010): Voxel-based morphometry in eating disorders: correlation of psychopathology with grey matter volume. *Psychiatry Res.* 182: 146–151.

Suchan B, Busch M, Schulte D, Grönemeyer D, Grönermeyer D, Herpertz S, Vocks S (2010): Reduction of gray matter density in the extrastriate body area in women with anorexia nervosa. *Behav Brain Res.* 206: 63–67.

Brooks SJ, Barker GJ, O'Daly OG, Brammer M, Williams SCR, Benedict C, *et al.* (2011): Restraint of appetite and reduced regional brain volumes in anorexia nervosa: a voxel-based morphometric study. *BMC Psychiatry.* 11: 179.

Gaudio S, Nocchi F, Franchin T, Genovese E, Cannatà V, Longo D, Fariello G (2011): Gray matter decrease distribution in the early stages of Anorexia Nervosa restrictive type in adolescents. *Psychiatry Res.* 191: 24–30.

Joos A, Hartmann A, Glauche V, Perlov E, Unterbrink T, Saum B, *et al.* (2011): Grey matter deficit in long-term recovered anorexia nervosa patients. *Eur Eat Disord Rev.* 19: 59–63.

Roberto CA, Mayer LES, Brickman AM, Barnes A, Muraskin J, Yeung L-K, *et al.* (2011): Brain tissue volume changes following weight gain in adults with anorexia nervosa. *Int J Eat Disord.* 44: 406–411.

Rothmund Y, Buchwald C, Georgiewa P, Bohner G, Bauknecht H-C, Ballmaier M, *et al.* (2011): Compulsivity predicts fronto striatal activation in severely anorectic individuals. *Neuroscience.* 197: 242–250.

Suda M, Narita K, Takei Y, Aoyama Y, Takahashi K, Yuki N, *et al.* (2011): Changes in gray matter volume with rapid body weight changes in anorexia nervosa: a voxel-based morphometric study. *Biol Psychiatry.* 70: e35-36.

Friederich H-C, Walther S, Bendszus M, Biller A, Thomann P, Zeigermann S, *et al.* (2012): Grey matter abnormalities within cortico-limbic-striatal circuits in acute and weight-restored anorexia nervosa patients. *NeuroImage.* 59: 1106–1113.

Joos A, Saum B, Hartmann A, Tüscher O, Tebartz van Elst L, Zeeck A (2012): Distinct functional and structural cerebral abnormalities in eating disorders in the light of diagnostic classification systems. *Psychother Psychosom.* 81: 394–395.

Mainz V, Schulte-Rüther M, Fink GR, Herpertz-Dahlmann B, Konrad K (2012): Structural brain abnormalities in adolescent anorexia nervosa before and after weight recovery and associated hormonal changes. *Psychosom Med.* 74: 574–582.

Amianto, F., Caroppo, P., D'Agata, F., Spalatro, A., Lavagnino, L., Caglio, M., (2013). Brain volumetric abnormalities in patients with anorexia and bulimia nervosa: a voxel-based morphometry study. *Psychiatry Research*, 213(3), 210–216. doi.org/10.1016/j.psychresns.2013.03.010

Bomba M, Riva A, Veggo F, Grimaldi M, Morzenti S, Neri F, Nacinovich R (2013): Impact of speed and magnitude of weight loss on the development of brain trophic changes in adolescents with anorexia nervosa: a case control study. *Ital J Pediatr.* 39: 14.

Frank GK, Shott ME, Hagman JO, Mittal VA (2013): Alterations in brain structures related to taste reward circuitry in ill and recovered anorexia nervosa and in bulimia nervosa. *Am J Psychiatry.* 170: 1152–1160.

Lázaro L, Andrés S, Calvo A, Cullell C, Moreno E, Plana MT, *et al.* (2013): Normal gray and white matter volume after weight restoration in adolescents with anorexia nervosa. *Int J Eat Disord.* 46: 841–848.

Cowdrey FA, Filippini N, Park RJ, Smith SM, McCabe C (2014): Increased resting state functional connectivity in the default mode network in recovered anorexia nervosa. *Hum Brain Mapp.* 35: 483–491.

Favaro, A., Tenconi, E., Degortes, D., Manara, R. & Santonastaso, P. Effects of obstetric complications on volume and functional connectivity of striatum in anorexia nervosa patients. *Int. J. Eat. Disord.* **47**, 686–695 (2014).

Fonville L, Giampietro V, Williams SCR, Simmons A, Tchanturia K (2014): Alterations in brain structure in adults with anorexia nervosa and the impact of illness duration. *Psychol Med.* 44: 1965–1975.

Nagahara Y, Nakamae T, Nishizawa S, Mizuhara Y, Moritoki Y, Wada Y, *et al.* (2014): A tract-based spatial statistics study in anorexia nervosa: Abnormality in the fornix and the cerebellum. *Prog Neuropsychopharmacol Biol Psychiatry.* 51: 72–77.

Bär K-J, de la Cruz F, Berger S, Schultz CC, Wagner G (2015): Structural and functional differences in the cingulate cortex relate to disease severity in anorexia nervosa. *J Psychiatry Neurosci JPN.* 40: 269–279.

Beadle JN, Paradiso S, Brumm M, Voss M, Halmi K, McCormick LM (2015): Larger hippocampus size in women with anorexia nervosa who exercise excessively than healthy women. *Psychiatry Res.* 232: 193–199.

Biezonski D, Cha J, Steinglass J, Posner J (2015): Evidence for thalamocortical circuit abnormalities and associated cognitive dysfunctions in underweight individuals with anorexia nervosa. *Neuropsychopharmacology.*

Bomba M, Riva A, Morzenti S, Grimaldi M, Neri F, Nacinovich R (2015): Global and regional brain volumes normalization in weight-recovered adolescents with anorexia nervosa: preliminary findings of a longitudinal voxel-based morphometry study. *Neuropsychiatr Dis Treat.* 11: 637–645.

Burkert NT, Koschutnig K, Ebner F, Freidl W (2015): Structural hippocampal alterations, perceived stress, and coping deficiencies in patients with anorexia nervosa. *Int J Eat Disord.* 48: 670–676.

Cerasa A, Castiglioni I, Salvatore C, Funaro A, Martino I, Alfano S, *et al.* (2015): Biomarkers of Eating Disorders Using Support Vector Machine Analysis of Structural Neuroimaging Data: Preliminary Results. *Behav Neurol.* 2015.

D'Agata F, Caroppo P, Amianto F, Spalatro A, Caglio MM, Bergui M, *et al.* (2015): Brain correlates of alexithymia in eating disorders: A voxel-based morphometry study. *Psychiatry Clin Neurosci.* 69: 708–716.

Favaro A, Tenconi E, Degortes D, Manara R, Santonastaso P (2015): Gyrfication brain abnormalities as predictors of outcome in anorexia nervosa. *Hum Brain Mapp.* 36: 5113–5122.

Fugset TS, Endestad T, Landrø NI, Rø Ø (2015): Brain structure alterations associated with weight changes in young females with anorexia nervosa: a case series. *Neurocase.* 21: 169–177.

Fujisawa TX, Yatsuga C, Mabe H, Yamada E, Masuda M, Tomoda A (2015): Anorexia Nervosa during Adolescence Is Associated with Decreased Gray Matter Volume in the Inferior Frontal Gyrus. *PloS One.* 10: e0128548.

King JA, Geisler D, Ritschel F, Boehm I, Seidel M, Roschinski B, *et al.* (2015): Global cortical thinning in acute anorexia nervosa normalizes following long-term weight restoration. *Biol Psychiatry.* 77: 624–632. 17.

Lavagnino L, Amianto F, Mwangi B, D'Agata F, Spalatro A, Zunta-Soares GB, *et al.* (2015): Identifying neuroanatomical signatures of anorexia nervosa: a multivariate machine learning approach. *Psychol Med.* 45: 2805–2812.

Schultz CC, Wagner G, de la Cruz F, Berger S, Reichenbach JR, Sauer H, Bär KJ (2015): Evidence for alterations of cortical folding in anorexia nervosa. *Eur Arch Psychiatry Clin Neurosci.* 1–9.

Seitz J, Walter M, Mainz V, Herpertz-Dahlmann B, Konrad K, von Polier G (2015): Brain volume reduction predicts weight development in adolescent patients with anorexia nervosa. *J Psychiatr Res.* 68: 228–237.

van Opstal AM, Westerink AM, Teeuwisse WM, van der Geest MAM, van Furth EF, van der Grond J (2015): Hypothalamic BOLD response to glucose intake and hypothalamic volume are similar in anorexia nervosa and healthy control subjects. *Front Neurosci.* 9. doi: 10.3389/fnins.2015.00159.

Bang L, Rø Ø, Endestad T (2016): Normal gray matter volumes in women recovered from anorexia nervosa: a voxel-based morphometry study. *BMC Psychiatry.* 16: 144.

Bernardoni F, King JA, Geisler D, Stein E, Jaite C, Nätsch D, *et al.* (2016): Weight restoration therapy rapidly reverses cortical thinning in anorexia nervosa: A longitudinal study. *NeuroImage.* 130: 214–222.

Fuglset TS, Endestad T, Hilland E, Bang L, Tamnes CK, Landrø NI, Rø Ø (2016): Brain volumes and regional cortical thickness in young females with anorexia nervosa. *BMC Psychiatry.* 16: 404.

Khalsa SS, Kumar R, Patel V, Strober M, Feusner JD (2016): Mammillary body volume abnormalities in anorexia nervosa. *Int J Eat Disord.* 49: 920–929.

Lavagnino L, Amianto F, Mwangi B, D'Agata F, Spalatro A, Zunta Soares GB, *et al.* (2016): The relationship between cortical thickness and body mass index differs

between women with anorexia nervosa and healthy controls. *Psychiatry Res.* 248: 105–109.

Solstrand Dahlberg L, Wiemerslage L, Swenne I, Larsen A, Stark J, Rask-Andersen M, *et al.* (2016): Adolescents newly diagnosed with eating disorders have structural differences in brain regions linked with eating disorder symptoms. *Nord J Psychiatry.* 1–9.

Boto J, Gkinis G, Roche A, Kober T, Maréchal B, Ortiz N, *et al.* (2017): Evaluating anorexia-related brain atrophy using MP2RAGE-based morphometry *Eur Radiol.* doi: 10.1007/s00330-017-4914-9.

## **DTI studies counted in Figure 2**

Frieling H, Fischer J, Wilhelm J, Engelhorn T, Bleich S, Hillemacher T, *et al.* (2012): Microstructural abnormalities of the posterior thalamic radiation and the mediodorsal thalamic nuclei in females with anorexia nervosa – A voxel based diffusion tensor imaging (DTI) study. *J Psychiatr Res.* 46: 1237–1242.

Kazlouski D, Rollin MD, Tregellas J, Shott ME, Jappe LM, Hagman JO, *et al.* (2011): Altered fimbria-fornix white matter integrity in anorexia nervosa predicts harm avoidance. *Psychiatry Res Neuroimaging.* 192: 109–116.

Yau W-YW, Bischoff-Grethe A, Theilmann RJ, Torres L, Wagner A, Kaye WH, Fennema-Notestine C (2013): Alterations in white matter microstructure in women recovered from anorexia nervosa. *Int J Eat Disord.* 46: 701–708.

Via E, Zalesky A, Sánchez I, Forcano L, Harrison BJ, Pujol J, *et al.* (2014): Disruption of brain white matter microstructure in women with anorexia nervosa. *J Psychiatry Neurosci JPN.* 39: 367–375.

Hayes DJ, Lipsman N, Chen DQ, Woodside DB, Davis KD, Lozano AM, Hodaie M (2015): Subcallosal cingulate connectivity in anorexia nervosa patients differs from healthy controls: A multi-tensor tractography study. *Brain Stimulat.* 8: 758–768.

Travis KE, Golden NH, Feldman HM, Solomon M, Nguyen J, Mezer A, *et al.* (2015): Abnormal white matter properties in adolescent girls with anorexia nervosa. *NeuroImage Clin.* 9: 648–659.

Cha J, Ide JS, Bowman FD, Simpson HB, Posner J, Steinglass JE (2016): Abnormal reward circuitry in anorexia nervosa: A longitudinal, multimodal MRI study. *Hum Brain Mapp.* 37: 3835–3846.

Frank GW, Shott ME, Riederer J, Pryor TL (2016): Altered structural and effective connectivity in anorexia and bulimia nervosa in circuits that regulate energy and reward homeostasis. *Transl Psychiatry.* 6: e932.

Pfuhl G, King JA, Geisler D, Roschinski B, Ritschel F, Seidel M, *et al.* (2016): Preserved white matter microstructure in young patients with anorexia nervosa? *Hum Brain Mapp.* 37: 4069–4083.

Shott ME, Pryor TL, Yang TT, Frank GW (2016): Greater Insula White Matter Fiber Connectivity in Women Recovered from Anorexia Nervosa. *Neuropsychopharmacology*. 41: 498–507.

Vogel K, Timmers I, Kumar V, Nickl-Jockschat T, Bastiani M, Roebroek A, *et al.* (2016): White matter microstructural changes in adolescent anorexia nervosa including an exploratory longitudinal study. *Neuroimage Clin*. 11: 614–621.

Zhang A, Leow A, Zhan L, GadElkarim J, Moody T, Khalsa S, *et al.* (2016): Brain connectome modularity in weight-restored anorexia nervosa and body dysmorphic disorder. *Psychol Med*. 46: 2785–2797.

Canna A, Prinster A, Monteleone AM, Cantone E, Monteleone P, Volpe U, *et al.* (2017): Interhemispheric functional connectivity in anorexia and bulimia nervosa. *Eur J Neurosci*. 45: 1129–1140.

Olivo G, Wiemerslage L, Swenne I, Zhukowsky C, Salonen-Ros H, Larsson E-M, *et al.* (2017): Limbic-thalamo-cortical projections and reward-related circuitry integrity affects eating behavior: A longitudinal DTI study in adolescents with restrictive eating disorders. *PLOS ONE*. 12: e0172129.

Kaufmann L-K, Baur V, Hänggi J, Jäncke L, Piccirelli M, Kollias S, *et al.* (2017): Fornix Under Water? Ventricular Enlargement Biases Forniceal Diffusion Magnetic Resonance Imaging Indices in Anorexia Nervosa. *Biological Psychiatry: Cognitive Neuroscience and Neuroimaging*, July 2017 issue. 2: 430–437.

Gaudio S, Quattrocchi CC, Piervincenzi C, Zobel BB, Montecchi FR, Dakanalis A, *et al.* (2017): White matter abnormalities in treatment-naive adolescents at the earliest stages of Anorexia Nervosa: A diffusion tensor imaging study. *Psychiatry Research: Neuroimaging*. 266: 138–145.

**Table S1: Summary of published DTI studies in AN (until 7/2017).** Complete references are provided above.\* denotes studies that included analyses of WM connectivity. Summaries of main findings are limited to primary analyses of anisotropy/diffusivity and WM connectivity and do not include supplementary analyses of relationships with clinical variables. Data on psychotropic medication and psychiatric comorbidities are given in numbers of AN patients.

| author                                                                                                                                                                                                                                                                                                                                                                                                                                                                                                        | sample size              | AN subtype       | age (years) +/-SD (AN/HC)                     | DOI ±SD (years) | medication | psychiatric comorbidities       | time start of realimentation - scanning | image acquisition (tesla/ b/ gradient directions/ resolution)                    | white matter volume                                      | DTI software    | parameters     |
|---------------------------------------------------------------------------------------------------------------------------------------------------------------------------------------------------------------------------------------------------------------------------------------------------------------------------------------------------------------------------------------------------------------------------------------------------------------------------------------------------------------|--------------------------|------------------|-----------------------------------------------|-----------------|------------|---------------------------------|-----------------------------------------|----------------------------------------------------------------------------------|----------------------------------------------------------|-----------------|----------------|
| Kazlouski et al., 2011                                                                                                                                                                                                                                                                                                                                                                                                                                                                                        | 16 acAN, 17 HC           | mixed            | acAN 23.9 ±7, HC 25.1 ±4                      | 7.5 ±8          | 8 of 16    | 8 of 16 (DD)                    | 1-2 weeks                               | 3T, b n/a, 25 directions, 3.5mm with 0.5 mm gap                                  | no group difference                                      | SPM, DTIStudio  | FA, ADC        |
| FA: AN < HC in bilateral fimbria-fornix, fronto-occipital and posterior cingulum.                                                                                                                                                                                                                                                                                                                                                                                                                             |                          |                  |                                               |                 |            |                                 |                                         |                                                                                  |                                                          |                 |                |
| Frieling et al., 2012                                                                                                                                                                                                                                                                                                                                                                                                                                                                                         | 12 acAN, 9 recAN, 20 HC  | only restrictive | acAN 26.8 ±6.9, recAN 27.4 ±5.3, HC 24.8 ±2.6 | n/a             | n/a        | n/a                             | n/a                                     | 3T, b=1000 s/mm <sup>2</sup> , 15 directions, 4mm thickness no gap               | n/a                                                      | SPM             | FA, ADC        |
| FA: AN < HC in bilateral posterior thalamic radiation, left mediadorsal thalamus, bilateral posterior coronal radiata, left middle cerebellar peduncle, left superior longitudinal fasciculus.                                                                                                                                                                                                                                                                                                                |                          |                  |                                               |                 |            |                                 |                                         |                                                                                  |                                                          |                 |                |
| Frank et al., 2013                                                                                                                                                                                                                                                                                                                                                                                                                                                                                            | 19 acAN, 22 HC           | mixed            | acAN 15.4 ±1.4, HC 14.8 ±1.8                  | n/a             | 11 of 19   | 5 of 19                         | min 1 week                              | 3T, b n/a, 25 directions, 3.5mm thickness with 0.5 mm gap                        | WM volume greater in AN than HC in several brain regions | SPM, NordiciCE  | FA, ADC        |
| FA: AN < HC in left fornix, bilateral cingulum, right forceps major, right superior and left posterior corona radiata. AN > HC in left superior longitudinal fasciculus, bilateral anterior corona radiata and bilateral inferior fronto-occipital fasciculus. ADC: AN > HC in left fornix, right corpus callosum, right corticospinal tract, right posterior corona radiata, bilateral corticopontine tract, bilateral superior longitudinal fasciculus.                                                     |                          |                  |                                               |                 |            |                                 |                                         |                                                                                  |                                                          |                 |                |
| Yau et al., 2013                                                                                                                                                                                                                                                                                                                                                                                                                                                                                              | 12 recAN, 10 HC          | only restrictive | recAN 28.7 ±7.9, HC 26.7 ±5.4                 | 6 ±5            | none       | none                            | weight restored                         | 3T, b=1000 s/mm <sup>2</sup> , 55 directions, 2.5mm isotropic, n/a               | n/a                                                      | FSL             | FA, MD, RD, AD |
| FA: no group differences. MD: AN < HC in left superior frontal WM including corona radiata (superior and posterior), corpus callosum (body and bilateral splenium), posterior limb of capsula interna, left superior longitudinal fasciculus, left posterior cingulum, precuneus and superior parietal WM, left dorsal cingulum, right precuneus and posterior corona radiata, right posterior cingulum and posterior corona radiata. In all of these regions, AD and/or RD was reduced in AN relative to HC. |                          |                  |                                               |                 |            |                                 |                                         |                                                                                  |                                                          |                 |                |
| Via et al., 2014                                                                                                                                                                                                                                                                                                                                                                                                                                                                                              | 19 acAN, 19 HC           | only restrictive | acAN 28.4 ±9.6, HC 28.6 ±8.6                  | 3+/-3           | 5 of 19    | n/a                             | min 1 week                              | 1.5T, b=1000 s/mm <sup>2</sup> , 25 directions, 5mm thickness no gap             | no group difference                                      | FSL, TBSS       | FA, MD         |
| FA: AN < HC in the parietal portion of the superior longitudinal fasciculus and fornix. MD: AN > HC in the superior longitudinal fasciculus and fornix. Decreased FA in the superior longitudinal fasciculus was driven largely by increased RD, while increased MD in the fornix was driven by both increased AD and RD.                                                                                                                                                                                     |                          |                  |                                               |                 |            |                                 |                                         |                                                                                  |                                                          |                 |                |
| Nagahara et al., 2014                                                                                                                                                                                                                                                                                                                                                                                                                                                                                         | 17 acAN, 18 HC           | n/a              | acAN 23.8 ±6.7, HC 26.2 ±5.6                  | 5 ±5            | 6 of 17    | 4 of 17 (DD)                    | n/a                                     | 3T, b=1000 s/mm <sup>2</sup> , 32 directions, 2mm thickness no gap               | n/a                                                      | FSL, TBSS       | FA, MD         |
| FA: AN < HC in left cerebellum. MD: AN > HC in the anterior body of the fornix. AN < HC in the right corpus callosum and right superior longitudinal fasciculus. Group differences did not remain significant after controlling for medication.                                                                                                                                                                                                                                                               |                          |                  |                                               |                 |            |                                 |                                         |                                                                                  |                                                          |                 |                |
| Shott et al., 2015*                                                                                                                                                                                                                                                                                                                                                                                                                                                                                           | 24 recAN, 24 HC          | only restrictive | recAN 30.3 ±8.1, HC 27.4 ± 6.3                | 6 ±5            | 6 of 24    | 9 of 24 (3 DD, 4 AnxD, 2 DD/AD) | weight restored                         | n/a, b=1000 s/mm <sup>2</sup> , 25 directions, 2.6mm thickness no gap            | no group difference                                      | FSL, Protrackx2 | FA, MD, RD, AD |
| FA: AN < HC in anterior coronata radiata, capsula interna, cerebellum (corticopontine tract, inferior and middle peduncle), corpus callosum, anterior thalamic radiation, inferior fronto-occipital, unicate fasciculus. Probabilistic tractography suggested increased WM connectivity between bilateral insula and ventral striatum, left insula and middle orbitofrontal cortex and right insula to gyrus rectus and medial orbitofrontal cortex.                                                          |                          |                  |                                               |                 |            |                                 |                                         |                                                                                  |                                                          |                 |                |
| Hayes et al., 2015*                                                                                                                                                                                                                                                                                                                                                                                                                                                                                           | 8 acAN, 8 HC             | mixed            | acAN 35 ±11, HC 36 ±9                         | 16 ±6           | 8 of 8     | 7 of 8                          | n/a                                     | 3T, b=1000s/mm <sup>2</sup> , 60 directions, 0.94*0.94*3.0 mm <sup>3</sup> , n/a | n/a                                                      | FSL, 3D Slicer  | FA, RD, AD     |
| FA: AN < HC in bilateral anterior limb of capsula interna, left inferior fronto-occipital fasciculus, right anterior cingulum (with corresponding decreases in AD and increases in RD). AN > HC in the left fornix crus. Deterministic multitensor tractography suggested WM connectivity to be increased in prefrontal and left occipitoparietal cortices and decreased in thalamus in AN relative to HC.                                                                                                    |                          |                  |                                               |                 |            |                                 |                                         |                                                                                  |                                                          |                 |                |
| Travis et al., 2015                                                                                                                                                                                                                                                                                                                                                                                                                                                                                           | 15 acAN, 15 HC           | only restrictive | acAN 16.6 ±1.4, HC 17.1 ±1.3                  | 1 ±1            | 2 of 15    | n/a                             | n/a (outpatients)                       | 3T, b=2500 s/mm <sup>2</sup> , 96 directions, 2mm <sup>3</sup> isotropic, n/a    | n/a                                                      | MrDiffusion     | FA             |
| FA: AN < HC in 4 tracts (right anterior superior longitudinal fasciculus, bilateral fibra-fornix, motor subdivision of corpus callosum). AN > HC in 2 tracts (right anterior thalamic radiation, left anterior superior longitudinal fasciculus). T1 relaxometry also revealed evidence suggestive of reduced myelin content in AN in 11 out of the 26 investigated WM tracts and subdivisions of the corpus callosum.                                                                                        |                          |                  |                                               |                 |            |                                 |                                         |                                                                                  |                                                          |                 |                |
| Pfuhl, King et al., 2016                                                                                                                                                                                                                                                                                                                                                                                                                                                                                      | 35 acAN, 32 recAN, 62 HC | mixed            | acAN 16.1 ±2.8, recAN 22.5 ±3, HC 16.4 ±2.6   | n/a             | none       | 2 of 35 (acAN), 7 of 32 (recAN) | within 96h                              | 3T, b=1300 s/mm <sup>2</sup> , 30 directions, 2.4 mm isotropic no gap            | no group difference                                      | FSL, TRACULA    | FA, MD, RD, AD |

No group differences in FA, MD, RD, AD after correction for multiple comparisons.



| author                                                                                                                                                                                                                                                                                                                                                                                                                                                                                                                                                                                                                                                                                                                                                                                 | sample size                                    | AN subtype       | age (years) +/-SD (AN/HC)                 | DOI ±SD (years) | medication | psychiatric comorbidities             | time start of realimentation - scanning                                  | image acquisition (tesla/ b/ gradient directions/ resolution)                                                                                      | white matter volume | DTI software       | parameters     |
|----------------------------------------------------------------------------------------------------------------------------------------------------------------------------------------------------------------------------------------------------------------------------------------------------------------------------------------------------------------------------------------------------------------------------------------------------------------------------------------------------------------------------------------------------------------------------------------------------------------------------------------------------------------------------------------------------------------------------------------------------------------------------------------|------------------------------------------------|------------------|-------------------------------------------|-----------------|------------|---------------------------------------|--------------------------------------------------------------------------|----------------------------------------------------------------------------------------------------------------------------------------------------|---------------------|--------------------|----------------|
| Cha et al., 2016*                                                                                                                                                                                                                                                                                                                                                                                                                                                                                                                                                                                                                                                                                                                                                                      | 22 acAN, 18 HC                                 | mixed            | acAN 19.5±2.42, HC 20.5±2.95              | n/a             | none       | 6 of 22 (3 DD, 3 SP)                  | min 1 week                                                               | 1.5T, b=800 s/mm <sup>2</sup> , 16 directions, 2mm isotropic no gap                                                                                | n/a                 | FSL, TBSS          | FA             |
| FA: AN > HC in the fronto-accumbal WM region of interest near the lateral orbitofrontal cortex and nucleus accumbens both before and after weight restoration. Probabilistic tractography suggested increased WM connectivity between nucleus accumbens and lateral orbitofrontal cortex in both hemispheres both before and after weight restoration.                                                                                                                                                                                                                                                                                                                                                                                                                                 |                                                |                  |                                           |                 |            |                                       |                                                                          |                                                                                                                                                    |                     |                    |                |
| Vogel et al., 2016                                                                                                                                                                                                                                                                                                                                                                                                                                                                                                                                                                                                                                                                                                                                                                     | 22 acAN, 21 HC                                 | mixed            | acAN 15+/-1.6, HC 15+/-1.0                | 1+/-1           | 2 of 20    | 4 of 22 (1 DD, 2 AnxD, 1 DD/AD)       | longitudinal observation at admission and discharge                      | 3T, b=1000 s/mm <sup>2</sup> , 30 directions, Protocol 1: 2mm <sup>3</sup> isotropic, Protocol 2: 2x2mm <sup>2</sup> /3.5 mm thickness and 10% gap | n/a                 | FSL, TBSS          | FA, MD, RD, AD |
| FA: AN > HC in the bilateral superior corona radiata, anterior corpus callosum, anterior and posterior thalamic radiation, anterior and posterior internal capsule, and the left inferior longitudinal fasciculus at admission using voxelwise TBSS. Elevated FA at admission was associated with reduced MD and RD, but not AD. No group differences were present at discharge using voxelwise TBSS analysis, but FA remained elevated in ROI analysis.                                                                                                                                                                                                                                                                                                                               |                                                |                  |                                           |                 |            |                                       |                                                                          |                                                                                                                                                    |                     |                    |                |
| Zhang et al., 2016*                                                                                                                                                                                                                                                                                                                                                                                                                                                                                                                                                                                                                                                                                                                                                                    | 24 recAN, 29 BDD, 31 HC                        | n/a              | recAN 21.3±4.5, BDD 23.2±5, HC 20.9±3.91  | 6±5 / 10±6      | none       | n/a                                   | weight restored                                                          | 3T, b=1000 s/mm <sup>2</sup> , 64 directions, n/a                                                                                                  | n/a                 | DTIStudio          | n/a            |
| No group differences in total fiber count. Analysis of WM connectivity revealed no group differences in network modularity using a standard metric (Q). Using a custom technique (Path Length Associated Community Estimation), abnormal modularity involving frontal, basal ganglia, and posterior cingulate nodes was observed in weight-restored AN patients. No standard analyses of anisotropy or diffusivity.                                                                                                                                                                                                                                                                                                                                                                    |                                                |                  |                                           |                 |            |                                       |                                                                          |                                                                                                                                                    |                     |                    |                |
| Canna et al., 2016                                                                                                                                                                                                                                                                                                                                                                                                                                                                                                                                                                                                                                                                                                                                                                     | 15 acAN, 13 BN, 16 HC                          | n/a              | acAN 25.3±1.6, BN 27.2±2, HC: 26.1±3.5    | n/a             | none       | none                                  | n/a                                                                      | 3T, b=1000 s/mm <sup>2</sup> , 16 directions, 2mm <sup>3</sup> isotropic with 0.4 mm gap                                                           | n/a                 | DTIStudio          | FA             |
| FA: Analyses focused only on corpus callosum. No group differences were significant.                                                                                                                                                                                                                                                                                                                                                                                                                                                                                                                                                                                                                                                                                                   |                                                |                  |                                           |                 |            |                                       |                                                                          |                                                                                                                                                    |                     |                    |                |
| Frank et al., 2016*                                                                                                                                                                                                                                                                                                                                                                                                                                                                                                                                                                                                                                                                                                                                                                    | 26 acAN, 25 BN, 26 HC                          | only restrictive | acAN= 23.2±5.3, BN= 24.6±4.2, HC 24.4±3.5 | 7±6 / 7±5       | 16 of 26   | 19 of 26 (4 DD, 5 AnxD, 10 DD/AD)     | 1-2 weeks                                                                | 3T, b=1000 s/mm <sup>2</sup> , 25 directions, 2.6mm thickness no gap                                                                               | n/a                 | DTIStudio          | FA             |
| FA: Analyses focused on fiber paths belonging to a priori-defined brain taste-reward network. FA was reduced in AN relative to HC (AN < HC) from the left ventral anterior insula/gyrus rectus to ventral striatum, the left posterior insula to middle OFC, the right middle OFC to hypothalamus, the right central nucleus of amygdala to hypothalamus, the left dorsal anterior insula to gyrus rectus, the right dorsal anterior insula to ventral striatum, the left medial OFC to hypothalamus, the right medial OFC to ventral striatum and the left gyrus rectus to PFC. WM connection strength was increased (AN > HC) in pathways between insula, orbitofrontal cortex and ventral striatum, but decreased (AN < HC) from orbitofrontal cortex and amygdala to hypothalamus. |                                                |                  |                                           |                 |            |                                       |                                                                          |                                                                                                                                                    |                     |                    |                |
| Olivo et al., 2017                                                                                                                                                                                                                                                                                                                                                                                                                                                                                                                                                                                                                                                                                                                                                                     | 1 acAN, 11 EDNOS, 24 HC                        | only restrictive | acAN= 16, EDNOS= 14.9±1.6, HC 14.1        | n/a             | none       | 6 of 12 (6 DD, 1 AnxD, 2 PTSD, 1 OCD) | longitudinal study: baseline upon diagnosis and follow-up one year later | 3T, b n/a, 48 directions, 1.75 mm <sup>3</sup> isotropic, n/a                                                                                      | n/a                 | FSL, TBSS          | FA, MD, RD, AD |
| FA: AN/EDNOS < HC at baseline in corpus callosum, corona radiata and posterior thalamic radiation, but no group differences at follow-up. RD: AN/EDNOS < HC at baseline in the same regions, but no group differences at follow-up.                                                                                                                                                                                                                                                                                                                                                                                                                                                                                                                                                    |                                                |                  |                                           |                 |            |                                       |                                                                          |                                                                                                                                                    |                     |                    |                |
| Kaufmann et al., 2017                                                                                                                                                                                                                                                                                                                                                                                                                                                                                                                                                                                                                                                                                                                                                                  | Pre-Study: 32 HC<br>Main Study: 25 acAN, 25 HC | n/a              | acAN= 22.8±4.8, HC=23.36±3.4              | 6.8±4.9         | 11 of 25   | n/a                                   | min 2 weeks                                                              | 3T, b=1000, 64 directions, 2 mm <sup>3</sup> isotropic, n/a                                                                                        | no group difference | FSL, TBSS, TRACULA | FA, RD, AD     |
| In a pre-study, the authors first demonstrated an inverse relationship between FA in the fornix and volumes of the surrounding third and lateral ventricles. In the main study, FA was reduced in the fornix in AN (AN < HC), but this group difference was significantly smaller after controlling for ventricular volumes and disappeared completely after correcting for free-water.                                                                                                                                                                                                                                                                                                                                                                                                |                                                |                  |                                           |                 |            |                                       |                                                                          |                                                                                                                                                    |                     |                    |                |
| Gaudio et al., 2017                                                                                                                                                                                                                                                                                                                                                                                                                                                                                                                                                                                                                                                                                                                                                                    | 14 acAN, 15 HC                                 | only restrictive | acAN=15.7±1.6, HC 16.3±1.5                | .4±.2           | none       | none                                  | min 1 week                                                               | 1.5 T, b=1000, 48directions, 2.5 mm thickness no gap                                                                                               | no group difference | FSL, TBSS          | FA, MD, RD, AD |
| FA: AN < HC in the left anterior and superior corona radiata and left superior longitudinal fasciculus. AD: AN < HC in the superior longitudinal fasciculus bilaterally and the left superior and anterior corona radiata. No group differences in RD or MD.                                                                                                                                                                                                                                                                                                                                                                                                                                                                                                                           |                                                |                  |                                           |                 |            |                                       |                                                                          |                                                                                                                                                    |                     |                    |                |

Abbreviations: acAN, acute, underweight phase AN; EDNOS, eating disorder not otherwise specified; recAN, weight recovered AN; HC, healthy control; DOI, duration of illness; FA, fractional anisotropy; ADC, apparent diffusion coefficient; MD, mean diffusivity; RD, radial diffusivity; AD, axial diffusivity ADHD, attention-deficit/hyperactivity disorder; BDD, body dysmorphic disorder; BN, bulimia nervosa; DOI, duration of illness; DD, depressive disorder; AnxD, anxiety disorder; OCD, obsessive-compulsive disorder; PTSD, post-traumatic stress disorder; SP, specific phobia.
